# Supplementary material for: Unsupervised contrastive peak caller for ATAC-seq
Source: HighWire-hosted journal article supplement (doi:10.1101/gr.277677.123), 2023-05-22
Supplement: Supplemental_Table_S7.xlsx [file Supplemental_Table_S7.xlsx]

## Sheet: ChromHMM_state_def
Symbol	Name	Interpretation	Source	Treatment
EnhA1	Active enhancer 1			True positive
EnhA2	Active enhancer 2			True positive
EnhBiv	Bivalent enhancer	The simultaneous enrichment of activating (such as H3K4me1 or H3K4me3) and repressing (such as H3K27me3) chromatin modifications	Bernhart, S. H. et al. Changes of bivalent chromatin coincide with increased expression of developmental genes in cancer. Sci. Rep. 6, 37393; doi: 10.1038/srep37393 (2016).	?
EnhG1	Genic enhancer 1	Enhancers in gene bodies and overlap with exons		True positive
EnhG2	Genic enhancer 2			True positive
EnhWk	Weak enhancer			?
Het	Heterochromatin	Heterochromatin is a constituent of eukaryotic genomes with functions spanning from gene expression silencing to constraining DNA replication and repair	https://doi.org/10.3389/fcell.2020.579137	True negative
Quies	Quiescent/Low	States with very little signal for any of the features used as inputs	PMC3553955	True negative
ReprPC	Repressed PolyComb	The histone modification H3K27me3, generated by the Polycomb repressor complex 2, covers some repressed genes.	PMC3553955	True negative
ReprPCWk	Weak repressed PolyComb			?
TssA	Active transcription start site			True positive
TssBiv	Bivalent/Poised TSS	Associated with both the activating H3K4me3 and the repressing H3K27me3 modifications. This matches a previously identified bivalent chromatin structure that silences genes but keeps them ready for activation	PMC3553955	?
TssFlnk	Flanking TSS	Regions right next to TSS, often marked by only H3K4me3		True positive
TssFlnkD	Flanking TSS downstream	Regions downstream of TSS, could be marked by H3K27ac, H3Kme1/3	PMC3553955	True positive
TssFlnkU	Flanking TSS upstream	Regions upstream of TSS, could be marked by H3K27ac (but weakly), H3Kme1/3	PMC3553955	True positive
Tx	Strong transcription	Regions with strong H3K36me3 which marks active genes	PMC3553955	True positive
TxWk	Week transcription	Regions with weak H3K36me3 which marks active genes	PMC3553955	?
ZNF/Rpts	ZNF genes and repeats		PMC3553955	True negative

## Sheet: MCF7-TF-ChIP
TF	Link
ARID3A	https://www.encodeproject.org/experiments/ENCSR231ENE/
BMI1	https://www.encodeproject.org/experiments/ENCSR966YYJ/
CREB1	https://www.encodeproject.org/experiments/ENCSR620DUQ/
CREB1	https://www.encodeproject.org/experiments/ENCSR897JAS/
CTBP1	https://www.encodeproject.org/experiments/ENCSR636EYA/
DPF2	https://www.encodeproject.org/experiments/ENCSR234VCE/
FOS	https://www.encodeproject.org/experiments/ENCSR569XNP/
FOXK2	https://www.encodeproject.org/experiments/ENCSR465VLK/
GATAD2B	https://www.encodeproject.org/experiments/ENCSR979FQP/
GATAD2B	https://www.encodeproject.org/experiments/ENCSR389BLX/
GTF2F1	https://www.encodeproject.org/experiments/ENCSR557JTZ/
HDGF	https://www.encodeproject.org/experiments/ENCSR200CUA/
HES1	https://www.encodeproject.org/experiments/ENCSR109ODF/
LARP7	https://www.encodeproject.org/experiments/ENCSR725ELR/
MLLT1	https://www.encodeproject.org/experiments/ENCSR427BBI/
MNT	https://www.encodeproject.org/experiments/ENCSR460XGV/
MTA2	https://www.encodeproject.org/experiments/ENCSR551ZDZ/
MTA3	https://www.encodeproject.org/experiments/ENCSR391KQC/
NBN	https://www.encodeproject.org/experiments/ENCSR591EBL/
NCOA3	https://www.encodeproject.org/experiments/ENCSR573OJP/
NCOA3	https://www.encodeproject.org/experiments/ENCSR686SOV/
NFIB	https://www.encodeproject.org/experiments/ENCSR582ZOA/
NFIB	https://www.encodeproject.org/experiments/ENCSR702BYX/
NONO	https://www.encodeproject.org/experiments/ENCSR912NMR/
NRF1	https://www.encodeproject.org/experiments/ENCSR135ANT/
PKNOX1	https://www.encodeproject.org/experiments/ENCSR986XYK/
SIN3A	https://www.encodeproject.org/experiments/ENCSR468LUO/
SP1	https://www.encodeproject.org/experiments/ENCSR729LGA/
SUZ12	https://www.encodeproject.org/experiments/ENCSR757EMK/
TARDBP	https://www.encodeproject.org/experiments/ENCSR801SWX/
ZBTB1	https://www.encodeproject.org/experiments/ENCSR309ELI/
ZBTB7B	https://www.encodeproject.org/experiments/ENCSR277BXW/
ZKSCAN1	https://www.encodeproject.org/experiments/ENCSR449UFF/
ZNF687	https://www.encodeproject.org/experiments/ENCSR899BKM/

## Sheet: GM12878-TF-ChIP
TF	Link
TARDBP	https://www.encodeproject.org/experiments/ENCSR412QBS/
NBN	https://www.encodeproject.org/experiments/ENCSR278SQL/
RBBP5	https://www.encodeproject.org/experiments/ENCSR330EXS/
HDAC2	https://www.encodeproject.org/experiments/ENCSR330OEO/

## Sheet: A549-TF-ChIP
TF	Link
HDAC2	https://www.encodeproject.org/experiments/ENCSR659LJJ/
RAD21	https://www.encodeproject.org/experiments/ENCSR000BUC/
MAX	https://www.encodeproject.org/experiments/ENCSR000BTJ/
PBX3	https://www.encodeproject.org/experiments/ENCSR000BTN/
CEBPB	https://www.encodeproject.org/experiments/ENCSR000BUB/
CBX8	https://www.encodeproject.org/experiments/ENCSR616MOB/
NR3C1	https://www.encodeproject.org/experiments/ENCSR355HLV/
CTCF	https://www.encodeproject.org/experiments/ENCSR035OXA/
NR3C1	https://www.encodeproject.org/experiments/ENCSR516IVY/
CEBPB	https://www.encodeproject.org/experiments/ENCSR701TCU/
JUNB	https://www.encodeproject.org/experiments/ENCSR431LRW/
EP300	https://www.encodeproject.org/experiments/ENCSR886OEO/
JUN	https://www.encodeproject.org/experiments/ENCSR048CVK/
FOSL2	https://www.encodeproject.org/experiments/ENCSR593DGU/
EP300	https://www.encodeproject.org/experiments/ENCSR686BQM/
HES2	https://www.encodeproject.org/experiments/ENCSR979IOT/
JUN	https://www.encodeproject.org/experiments/ENCSR192PBJ/
BCL3	https://www.encodeproject.org/experiments/ENCSR544GUO/

## Sheet: K562-TF-ChIP
TF	Link
ARNT	https://www.encodeproject.org/experiments/ENCSR613NUC/
ATF1	https://www.encodeproject.org/experiments/ENCSR159OCC/
BCL6	https://www.encodeproject.org/experiments/ENCSR802AHH/
CAMTA2	https://www.encodeproject.org/experiments/ENCSR336GFK/
CDC5L	https://www.encodeproject.org/experiments/ENCSR121PFY/
GTF2I	https://www.encodeproject.org/experiments/ENCSR653WFU/
HMBOX1	https://www.encodeproject.org/experiments/ENCSR757IIU/
IKZF1	https://www.encodeproject.org/experiments/ENCSR948VFL/
MLLT1	https://www.encodeproject.org/experiments/ENCSR675LRO/
MLLT1	https://www.encodeproject.org/experiments/ENCSR107GRP/
MLX	https://www.encodeproject.org/experiments/ENCSR873LYH/
NFXL1	https://www.encodeproject.org/experiments/ENCSR085DDI/
PKNOX1	https://www.encodeproject.org/experiments/ENCSR115SMW/
RHOXF2B	https://www.encodeproject.org/experiments/ENCSR551KXD/
RNF2	https://www.encodeproject.org/experiments/ENCSR076YPO/
RREB1	https://www.encodeproject.org/experiments/ENCSR250WFW/
THAP7	https://www.encodeproject.org/experiments/ENCSR193ZLW/
TRIM24	https://www.encodeproject.org/experiments/ENCSR957LDM/
TRIM24	https://www.encodeproject.org/experiments/ENCSR907MZR/
TRIM28	https://www.encodeproject.org/experiments/ENCSR474CVP/
ZBED1	https://www.encodeproject.org/experiments/ENCSR286PCG/
ZBTB12	https://www.encodeproject.org/experiments/ENCSR172OSX/
ZBTB40	https://www.encodeproject.org/experiments/ENCSR237VLT/
ZC3H8	https://www.encodeproject.org/experiments/ENCSR143CEO/
ZEB2	https://www.encodeproject.org/experiments/ENCSR322CFO/
ZKSCAN3	https://www.encodeproject.org/experiments/ENCSR199HGP/
ZNF134	https://www.encodeproject.org/experiments/ENCSR553NTC/
ZNF184	https://www.encodeproject.org/experiments/ENCSR546IHU/
ZNF24	https://www.encodeproject.org/experiments/ENCSR385AHH/
ZNF316	https://www.encodeproject.org/experiments/ENCSR167KBO/
ZNF319	https://www.encodeproject.org/experiments/ENCSR231PDA/
ZNF354B	https://www.encodeproject.org/experiments/ENCSR044IXA/
ZNF583	https://www.encodeproject.org/experiments/ENCSR775EQV/
ZNF655	https://www.encodeproject.org/experiments/ENCSR568YNC/
ZNF717	https://www.encodeproject.org/experiments/ENCSR987KYK/
ZNF77	https://www.encodeproject.org/experiments/ENCSR844MAB/
ZNF84	https://www.encodeproject.org/experiments/ENCSR376UMR/
ZSCAN29	https://www.encodeproject.org/experiments/ENCSR635EXI/
PHB	https://www.encodeproject.org/experiments/ENCSR650AWW/
KHSRP	https://www.encodeproject.org/experiments/ENCSR686EYO/
DPF2	https://www.encodeproject.org/experiments/ENCSR715CCR/
SUPT5H	https://www.encodeproject.org/experiments/ENCSR894CGX/
SMARCA5	https://www.encodeproject.org/experiments/ENCSR895HSJ/
BCOR	https://www.encodeproject.org/experiments/ENCSR808AKZ/
HDAC1	https://www.encodeproject.org/experiments/ENCSR711VWL/
MCM7	https://www.encodeproject.org/experiments/ENCSR068VRA/
MCM7	https://www.encodeproject.org/experiments/ENCSR542WJU/
HDGF	https://www.encodeproject.org/experiments/ENCSR563YDA/
SMARCA4	https://www.encodeproject.org/experiments/ENCSR587OQL/
HLTF	https://www.encodeproject.org/experiments/ENCSR090JNM/
LARP7	https://www.encodeproject.org/experiments/ENCSR288MOZ/
CSDE1	https://www.encodeproject.org/experiments/ENCSR626QJQ/
TARDBP	https://www.encodeproject.org/experiments/ENCSR033VAZ/
CBFA2T3	https://www.encodeproject.org/experiments/ENCSR697YLJ/
POLR2A	https://www.encodeproject.org/experiments/ENCSR388QZF/
MCM3	https://www.encodeproject.org/experiments/ENCSR990AZC/
GATAD2A	https://www.encodeproject.org/experiments/ENCSR160QYK/
MTA2	https://www.encodeproject.org/experiments/ENCSR411UYA/
YBX3	https://www.encodeproject.org/experiments/ENCSR567JEU/
